# Supplementary material for: Fear and food: Anxiety‐like behavior and the susceptibility to weight loss in an activity‐based anorexia rat model
Source: PubMed Central journal article supplement — Clin Transl Sci. 2021 Nov 25;15(4):889–98. doi: 10.1111/cts.13196 (PMC9010269; doi:10.1111/cts.13196), 2021-11-25
Supplement: CTS-15-889-s001.pdf [file CTS-15-889-s001.pdf]

**Table S1**

|            | Entries (closed arm) |               | Time (closed arm) [sec] |                 | Entries (closed and open arm) |               | Time mobile [sec] |                |
|------------|----------------------|---------------|-------------------------|-----------------|-------------------------------|---------------|-------------------|----------------|
|            | EPM1                 | EPM2          | EPM1                    | EPM2            | EPM1                          | EPM2          | EPM1              | EPM2           |
| <b>C</b>   | 33.08 ± 12.22        | 31.50 ± 14.18 | 378.62 ± 84.99          | 453.14 ± 68.42  | 48.08 ± 18.91                 | 41.92 ± 17.94 | 392.08 ± 84.05    | 264.24 ± 70.95 |
| <b>CRW</b> | 33.09 ± 6.82         | 30.83 ± 11.33 | 403.90 ± 79.32          | 422.43 ± 125.24 | 46.18 ± 9.98                  | 39.75 ± 15.50 | 338.54 ± 50.93    | 252.48 ± 71.54 |
| <b>LF</b>  | 35.42 ± 14.48        | 26.83 ± 9.53  | 357.68 ± 86.67          | 292.81 ± 70.87  | 51.67 ± 17.47                 | 47.67 ± 12.63 | 379.05 ± 49.85    | 301.73 ± 51.35 |
| <b>ABA</b> | 33.77 ± 10.59        | 22.31 ± 11.54 | 359.36 ± 73.74          | 303.25 ± 101.76 | 54.46 ± 14.03                 | 39.92 ± 13.42 | 386.54 ± 22.87    | 288.70 ± 69.67 |

**Table S1: Raw data of EPM**

Average number of entries in the closed arms, average time spent in the closed arms, average number of total entries in the closed and open arms and average time being mobile for all groups. Data are represented as mean ± standard deviation.

EPM1/2 = elevated plus maze at day 10/day 30, C= control, CRW = control+running-wheel, LF = limited food, ABA = activity-based anorexia.

## Table S2

| Variable                                               | Standardized $\beta$ coefficients | t      | p-value | VIF   |
|--------------------------------------------------------|-----------------------------------|--------|---------|-------|
| <b>RWA during induction of starvation</b>              | -.458                             | -2,484 | .032    | 1,408 |
| <b>entries in closed arms before starvation (EPM1)</b> | -.534                             | -2,897 | .016    | 1,408 |

### Table S2: Multiple Regression data

Multiple regression with days until target weight (body weight loss) as dependent variable and RWA during induction of starvation and entries in closed arms before starvation (EPM1, anxiety-like behavior) as independent variables.

EPM1 = elevated plus maze at day 10, RWA = running-wheel activity, VIF = variance inflation factor
